# Supplementary material
Source: MDPI journal article supplement (https://www.mdpi.com/2071-1050/14/18/11561)
Supplement: s1 [file s1]

Table S1. List of SSR markers used for molecular characterization and variety Identification of locally grown 25 potato varieties in Pakistan.

| Sr. No | Primers   | Primer Sequence 5' – 3'     |                              | References |
|--------|-----------|-----------------------------|------------------------------|------------|
|        |           | Forward Sequence            | Reverse Sequence             |            |
| 1      | S122      | GACACGTTACCATAAAA           | AGAAGAATAGCAAAGCAA           | [6]        |
| 2      | S168      | CTGCCGCAAAAAGTGAAAAC        | TGAATGTAGGCCAAATTTTGAA       | [6]        |
| 3      | S151      | GCTGCTAAACACTCAAGCAGAA      | CAACTACAAGATTCCATCCACAG      | [6]        |
| 4      | S184      | TCATCACAACGTGACCCCA         | GGGCTTGAATGATGTGAAGCTC       | [6]        |
| 5      | S7        | GACTGGCTGACCCTGAACTC        | GACAAAATTACAGGAAGTCAAA       | [6]        |
| 6      | S170      | CGCAAATCTTCATCCGATTC        | TCCGGCGGATAATACTTGTT         | [6]        |
| 7      | S118      | ACTGCTGTGGTTGGCGTC          | ACGGCATAGATTGGAAGCATC        | [6]        |
| 8      | S192      | ACTTCTGCATCTGGTGAAGC        | GGTCTGGATTCCCAGGTTG          | [6]        |
| 9      | S180      | ACTGCTGTGGTTGGCGTC          | ACGGCATAGATTGGAAGCATC        | [6]        |
| 10     | S174      | TGAGGGTTTTAGAAAAGGGA        | CATCCTTGCAACAACCTCCT         | [6]        |
| 11     | S25       | GCGAATGACAGGACAAGAGG        | TGCCACTGCTACCATAACCA         | [6]        |
| 12     | S189      | CCTTGTAAGACAGCAGTGGTC       | TCCGCCAAGACTGATGCA           | [6]        |
| 13     | S182      | GGAAGTCTCAACTGGCTG          | TCAACTATATGCCTACTGCCCAA      | [6]        |
| 14     | S120      | GTCTTTTTGGTGGTTTTCTT        | TTATTTCTCTGTTGTGCTG          | [6]        |
| 15     | S187      | CCGTGATGGGATTGCACA          | TGATATTAACCATGGCAGCAGC       | [6]        |
| 16     | S183      | TTCCTCTAAGCGGCAAAAGG        | GGAGGAGACTTGGGTTTCTCC        | [6]        |
| 17     | S162      | TATGGAATTCGGTGATGG          | GACGGTGACAAAGAGGAAGG         | [6]        |
| 18     | S153      | TATGTTCCACGCCATTTTCTCAG     | ACGGAAACTCATCGTGCATT         | [6]        |
| 19     | S148      | CAGCAAAATCAGAACCCGAT        | GGATCATCAAATTCACCGCT         | [6]        |
| 20     | S188      | GACAGAGAATATGGGACCACCA      | GCAGCACCTTAAATGGCTGAC        | [6]        |
| 21     | 4026/4027 | AACTTGCGGAATAAGTGACG        | ACTATACACACGTGCCCTGAAACTAG   | [30]       |
| 22     | 8242      | CGTCTTGATGTCTTAGTTGTGG      | GCAAAACCAGAAAGGCTAACAAAC     | [30]       |
| 23     | 12002     | CCATGAACCTGAAGTTTTCTGC      | TGGATATCTTGTGCCTACAAGCTAG    | [30]       |
| 24     | 16410     | GTATGTTTGAGTAAATCCTCCACCA   | TTCTCTGCCCCCTTTTAATTG        | [30]       |
| 25     | 31924     | CGAAGACACCAAATCGCTCAG       | GAAACGCCATTAACATTTTACATCG    | [30]       |
| 26     | 35584     | AGTAAGTCAAACCTCAACTCCAAGGTG | GTTCTAGATTATCTCACTCATGCCTTTC | [30]       |
| 27     | 43016     | CAAGCTGCATGAAAGCCATC        | TTTGCCTAAAAGTTTGTAGTGTGAGG   | [30]       |
| 28     | 46514     | TGCTTTTTGTTTCCTTTTGTGTG     | GGAATGAAACTAAGCCTTGCTCTG     | [30]       |
| 29     | STM1053   | TCTCCCCATCTTAATGTTTC        | CAACACAGCATAACAGATCATC       | [24]       |
| 30     | STM0037   | AATTTAACTTAGAAGATTAGTCTC    | ATTTGGTTGGGTATGATA           | [24]       |
| 31     | STM0031   | CATACGCACGCACGTACAC         | TTCAACCTATCATTTTGTGAGTCG     | [24]       |
| 32     | STM1104   | TGATTCTCTTGCCCTACTGTAATCG-  | CAAAGTGGTGTGAAGCTGTGA        | [24]       |
| 33     | STM1052   | CAATTTCGTTTTTTCATGTGACAC    | ATGGCGTAATTGATTAAATACGTAA    | [24]       |
| 34     | STM1106   | TCCAGCTGATTGGTTAGGTTG       | ATGCGAATCTACTCGTCATGG        | [24]       |
| 35     | STM5114   | AATGGCTCTCTCTGTATGCT        | GCTGTCCCAACTATCTTTGA         | [24]       |
| 36     | STG0016   | AGCTGCTCAGCATCAAGAGA        | ACCACCTCAGGCACTTCATC         | [24]       |
| 37     | STI0004   | GCTGCTAAACACTCAAGCAGAA      | CAACTACAAGATTCCATCCACAG      | [24]       |
| 38     | STI0012   | GAAGCGACTTCAAAAATCAGA       | AAAGGGAGGAATAGAAACCAAAA      | [24]       |
| 39     | STI0030   | TTGACCCTCCAACCTATAGATTCTTC  | TGACAACTTTAAAGCATATGTCAGC    | [24]       |
| 40     | STI0032   | TGGGAAGAATCCTGAAATGG        | TGCTCTACCAATTAACGGCA         | [24]       |
